# Supplementary material for: Socioeconomic characterization of regions through the lens of individual financial transactions
Source: PLOS journal article supplement (doi:10.1371/journal.pone.0187031), 2017-11-30
Supplement: S1 (10.1371/journal.pone.0187031.s001) [file journal.pone.0187031.s001]

Table S1: **Micro-socioeconomic indices** consist of 33 indices representing economic and social behavior of residence and businesses. These indices can be evaluated at various spatial scales from small scale of zip codes to large scale of provinces and countries based on the bank card transactions

| Index | Description                                                                                                                                                     |
|-------|-----------------------------------------------------------------------------------------------------------------------------------------------------------------|
| 1     | Density of the spending within the area                                                                                                                         |
| 2     | Density of the earnings within the area                                                                                                                         |
| 3     | Average amount of a single transaction earned within the area                                                                                                   |
| 4     | Annual number of transactions per customer living in the area                                                                                                   |
| 5     | Amount of transaction performed by customers living within the area                                                                                             |
| 6     | Percentage of area activity, received from out-of-province visitors                                                                                             |
| 7     | Percentage of area activity, received from foreign visitors                                                                                                     |
| 8     | Area's earning diversity: effective number of business categories to represent 80th percentiles of the total number of transactions earned by area's businesses |
| 9     | Area's spending diversity: effective number of business categories to represent 80th percentiles of the total number of transactions made by area's residents   |
| 10    | Area's business density                                                                                                                                         |
| 11    | Percentage of gas/parking/toll spending of area's residents                                                                                                     |
| 12    | Percentage of taxi spending of area's residents                                                                                                                 |
| 13    | Percentage of public transportation spending of area's residents                                                                                                |
| 14    | Percentage of cafe/restaurants spending of area's residents                                                                                                     |
| 15    | Percentage of fast food spending of area's residents                                                                                                            |
| 16    | Percentage of food spending of area's residents                                                                                                                 |
| 17    | Percentage of recreation spending of area's residents                                                                                                           |
| 18    | Percentage of fashion/beauty/jewelry spending of area's residents                                                                                               |
| 19    | Percentage of medical spending of area's residents                                                                                                              |
| 20    | Percentage of cultural spending of area's residents                                                                                                             |
| 21    | Percentage of travel spending of area's residents                                                                                                               |
| 22    | Percentage of area's residents nighttime spending                                                                                                               |
| 23    | Percentage of area's residents weekend spending                                                                                                                 |
| 24    | Percentage of area's residents nighttime money spending                                                                                                         |
| 25    | Percentage of area's residents weekend money spending                                                                                                           |
| 26    | Percentage of area's nighttime earnings                                                                                                                         |
| 27    | Percentage of area's residents weekend earnings                                                                                                                 |
| 28    | Percentage of area's nighttime business transactions                                                                                                            |
| 29    | Percentage of residents weekend transactions                                                                                                                    |
| 30    | Percentage of residents' activity performed outside the province                                                                                                |
| 31    | Percentage of out area residents' activity performed inside the province                                                                                        |
| 32    | Percentage of money spent by area residents outside the province                                                                                                |
| 33    | Area's residents spending in expensive locations.                                                                                                               |
